# Supplementary material
Source: Springer Nature journal article supplement (https://www.springermedizin.de/resource/supplementary/12946_2009_125_MOESM5_ESM.pdf/9555616)

**Liver / body weight ratio**

**%**

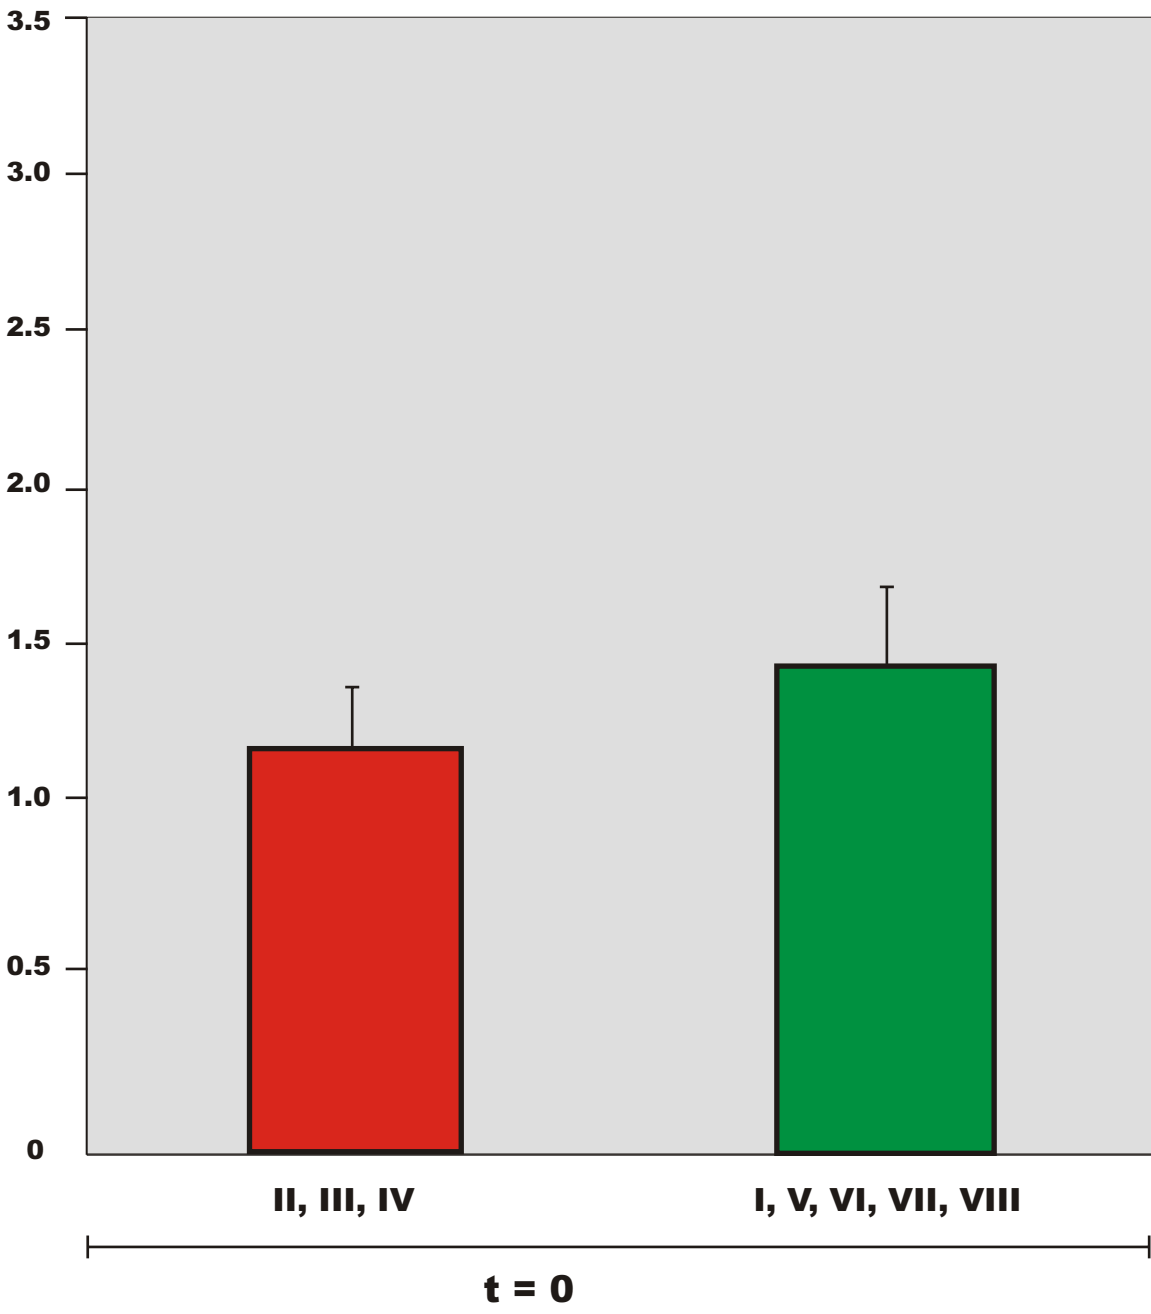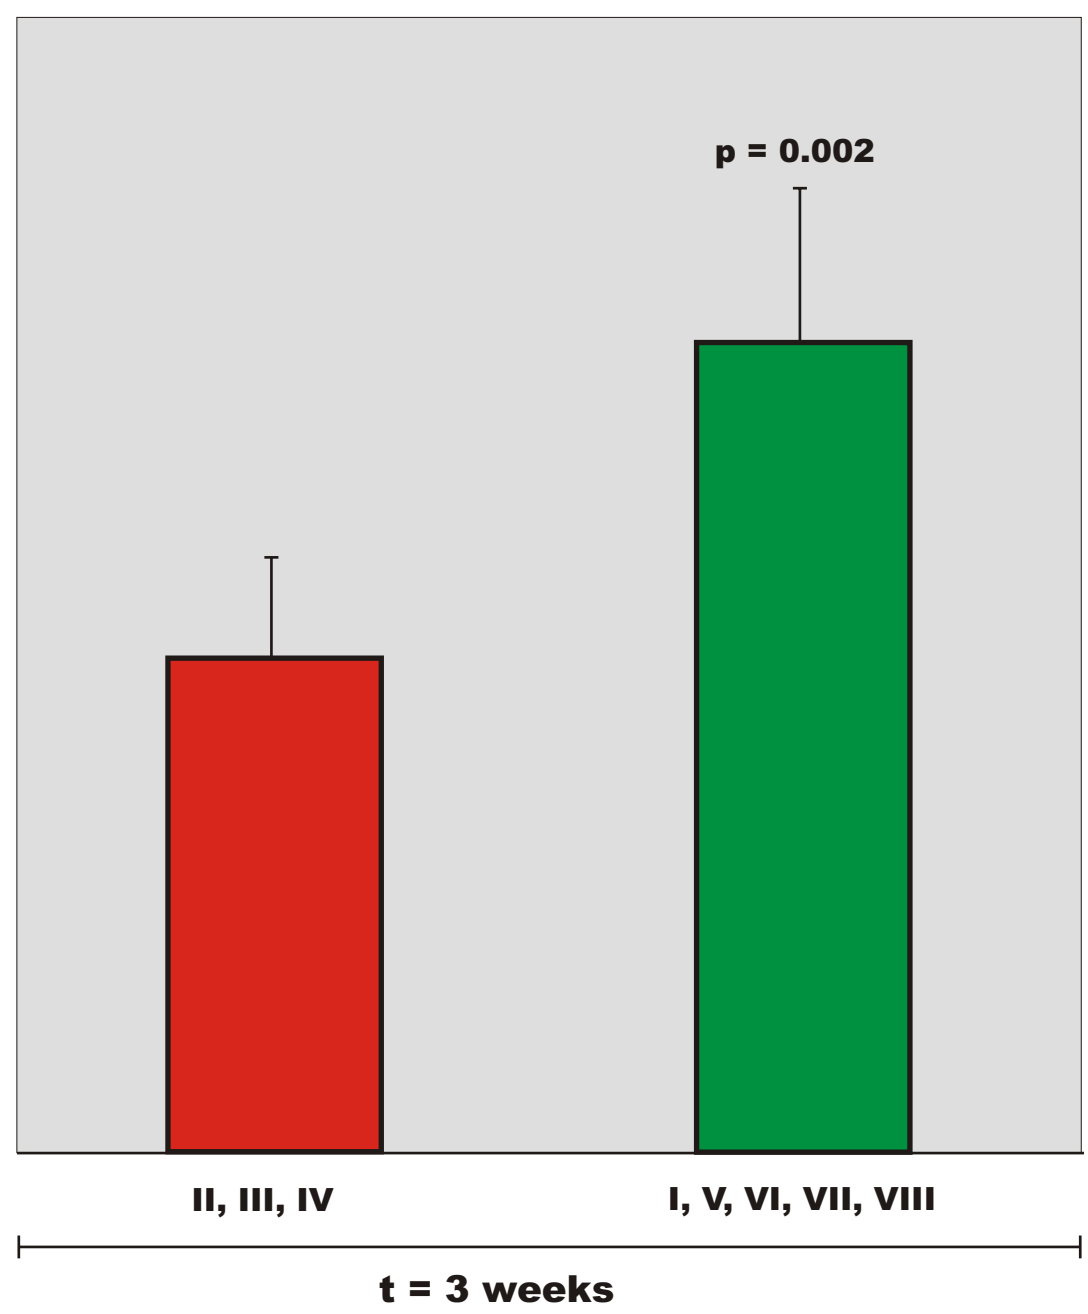

Supplement: MOESM5 [file 9555616]
